# Supplementary material for: Concurrent Validity Between Live and Home Video Observations Using the Alberta Infant Motor Scale
Source: PubMed Central journal article supplement — Pediatr Phys Ther. 2017 Mar 27;29(2):146–51. doi: 10.1097/PEP.0000000000000363 (PMC5374751; doi:10.1097/pep.0000000000000363), 2017-03-27
Supplement: ppyty-29-146-s001.pdf [file ppyty-29-146-s001.pdf]

## Appendix 1: Questionnaire for parents

|                                                                                                  |                                                                                                                                                                                                                                                                                                                                                                                                                        |
|--------------------------------------------------------------------------------------------------|------------------------------------------------------------------------------------------------------------------------------------------------------------------------------------------------------------------------------------------------------------------------------------------------------------------------------------------------------------------------------------------------------------------------|
| 1. What is the code assigned to your child by the GODIVA study? The code contains three numbers. |                                                                                                                                                                                                                                                                                                                                                                                                                        |
| 2. What is the code assigned to the investigator?                                                |                                                                                                                                                                                                                                                                                                                                                                                                                        |
| 3. What is your relation to the child?                                                           | <ul style="list-style-type: none"> <li><input type="radio"/> Mother</li> <li><input type="radio"/> Father/ Partner</li> <li><input type="radio"/> Otherwise, namely:</li> </ul>                                                                                                                                                                                                                                        |
| 4. What is your date of birth?                                                                   |                                                                                                                                                                                                                                                                                                                                                                                                                        |
| 5. What is the date of birth of your partner?                                                    |                                                                                                                                                                                                                                                                                                                                                                                                                        |
| 6. What is the highest level of education you completed?                                         | <ul style="list-style-type: none"> <li><input type="radio"/> No education finished</li> <li><input type="radio"/> Primary school</li> <li><input type="radio"/> Secondary school/ lower vocational education</li> <li><input type="radio"/> Secondary science education/ gymnasium</li> <li><input type="radio"/> University/ Higher vocational education</li> <li><input type="radio"/> Otherwise, namely:</li> </ul> |
| 7. What is the highest level of education your partner completed?                                | <ul style="list-style-type: none"> <li><input type="radio"/> No education finished</li> <li><input type="radio"/> Primary school</li> <li><input type="radio"/> Secondary school/ lower vocational education</li> <li><input type="radio"/> Secondary science education/ gymnasium</li> <li><input type="radio"/> University/ Higher vocational education</li> <li><input type="radio"/> Otherwise, namely:</li> </ul> |
| 8. My knowledge about motor development is more than average because of my job/study.            | <ul style="list-style-type: none"> <li><input type="radio"/> Absolutely</li> <li><input type="radio"/> Agree</li> <li><input type="radio"/> Neutral</li> <li><input type="radio"/> Disagree</li> <li><input type="radio"/> Absolutely not</li> </ul>                                                                                                                                                                   |
| 9. I think de motor development of my child is:                                                  | <ul style="list-style-type: none"> <li><input type="radio"/> Fast</li> <li><input type="radio"/> Above average</li> <li><input type="radio"/> Average</li> <li><input type="radio"/> Below average</li> <li><input type="radio"/> Slow</li> </ul>                                                                                                                                                                      |

### Questions about the instruction

|                                                                                             |                                                                                                                                                                                                                                                                                                                                                                                                                                                                                                                                                                      |
|---------------------------------------------------------------------------------------------|----------------------------------------------------------------------------------------------------------------------------------------------------------------------------------------------------------------------------------------------------------------------------------------------------------------------------------------------------------------------------------------------------------------------------------------------------------------------------------------------------------------------------------------------------------------------|
| 10. The instruction video for making the home video was useful.                             | <input type="radio"/> Yes, continue to question 12<br><input type="radio"/> No                                                                                                                                                                                                                                                                                                                                                                                                                                                                                       |
| 11. If you answered 'no': please explain why you feel the instruction video was not useful. | <input type="radio"/> The instruction video was too complex<br><input type="radio"/> The instruction video lasted too long<br><input type="radio"/> The instructions on the location were not feasible<br><input type="radio"/> The instructions on prone position were not clear<br><input type="radio"/> The instructions on supine position were not clear<br><input type="radio"/> The instructions on sitting position were not clear<br><input type="radio"/> The instructions on standing position were not clear<br><input type="radio"/> Otherwise, namely: |
| 12. The checklist was an useful addition to the instruction video.                          | <input type="radio"/> Absolutely<br><input type="radio"/> Agree<br><input type="radio"/> Neutral<br><input type="radio"/> Disagree<br><input type="radio"/> Absolutely not                                                                                                                                                                                                                                                                                                                                                                                           |
| 13. Which checklist and what instruction video did you use for making the home video?       | <input type="radio"/> Instruction video 1: the child who is not yet rolling over<br><input type="radio"/> Instruction video 2: the child who is rolling over and not yet crawling<br><input type="radio"/> Instruction video 3: the child who is crawling and/ or walking                                                                                                                                                                                                                                                                                            |

### Questions about making the home video

|                                                                             |                                                                                                                                                                            |
|-----------------------------------------------------------------------------|----------------------------------------------------------------------------------------------------------------------------------------------------------------------------|
| 14. My house is a suitable place for capturing the motor skills of my child | <input type="radio"/> Absolutely<br><input type="radio"/> Agree<br><input type="radio"/> Neutral<br><input type="radio"/> Disagree<br><input type="radio"/> Absolutely not |
| 15. Who assisted you during filming?                                        | <input type="radio"/> Nobody did<br><input type="radio"/> My partner<br><input type="radio"/> An older child<br><input type="radio"/> Otherwise, namely:                   |
| 16. Do you have the right camera equipment to film?                         | <input type="radio"/> Yes<br><input type="radio"/> No                                                                                                                      |

|                                                                                                                                           |                                                                                                                                                                                                                                                                                                                                                                                                      |
|-------------------------------------------------------------------------------------------------------------------------------------------|------------------------------------------------------------------------------------------------------------------------------------------------------------------------------------------------------------------------------------------------------------------------------------------------------------------------------------------------------------------------------------------------------|
| 17. What was the mood of your child during filming?                                                                                       | <ul style="list-style-type: none"> <li><input type="radio"/> Sleepy, inactive</li> <li><input type="radio"/> Calm, inactive</li> <li><input type="radio"/> Cheerful, active</li> <li><input type="radio"/> Whining, grumpy</li> <li><input type="radio"/> Crying, upset, angry</li> <li><input type="radio"/> Otherwise, namely:</li> </ul>                                                          |
| 18. How much time did you spend on preparations and actually making the home-video?                                                       | .....minutes                                                                                                                                                                                                                                                                                                                                                                                         |
| 19. My child showed all the motor skills he/she mastered on the home video.                                                               | <ul style="list-style-type: none"> <li><input type="radio"/> Yes, even better than that! I saw some new things. → skip question 20</li> <li><input type="radio"/> Yes, I agree → skip question 20</li> <li><input type="radio"/> No, my child has more skills than he/she showed on the home video</li> </ul>                                                                                        |
| 20. Which factors had a negative influence on the motor performance of your child?                                                        | <ul style="list-style-type: none"> <li><input type="radio"/> Distraction by noises or bustle</li> <li><input type="radio"/> Physical discomfort</li> <li><input type="radio"/> The mood my child was in</li> <li><input type="radio"/> The presence of (strange) persons</li> <li><input type="radio"/> No reason, happened by accident</li> <li><input type="radio"/> Otherwise, namely:</li> </ul> |
| 21. I enjoyed making a home-video of my child.                                                                                            | <ul style="list-style-type: none"> <li><input type="radio"/> Absolutely</li> <li><input type="radio"/> Agree</li> <li><input type="radio"/> Neutral</li> <li><input type="radio"/> Disagree</li> <li><input type="radio"/> Absolutely not</li> </ul>                                                                                                                                                 |
| 22. It was easy to determine if all the required positions and motor skills were captured on the home video.                              | <ul style="list-style-type: none"> <li><input type="radio"/> Absolutely</li> <li><input type="radio"/> Agree</li> <li><input type="radio"/> Neutral</li> <li><input type="radio"/> Disagree</li> <li><input type="radio"/> Absolutely not</li> </ul>                                                                                                                                                 |
| 23. It was easy to meet the technical criteria for making the home video.                                                                 | <ul style="list-style-type: none"> <li><input type="radio"/> Absolutely</li> <li><input type="radio"/> Agree</li> <li><input type="radio"/> Neutral</li> <li><input type="radio"/> Disagree</li> <li><input type="radio"/> Absolutely not</li> </ul>                                                                                                                                                 |
| 24. I can imagine the researcher/ Paediatric Physical Therapist is able to assess the motor performance of my child using the home video. | <ul style="list-style-type: none"> <li><input type="radio"/> Absolutely</li> <li><input type="radio"/> Agree</li> <li><input type="radio"/> Neutral</li> <li><input type="radio"/> Disagree</li> <li><input type="radio"/> Absolutely not</li> </ul>                                                                                                                                                 |
| 25. In general, making the home video was well to do.                                                                                     | <ul style="list-style-type: none"> <li><input type="radio"/> Absolutely</li> <li><input type="radio"/> Agree</li> <li><input type="radio"/> Neutral</li> <li><input type="radio"/> Disagree</li> <li><input type="radio"/> Absolutely not</li> </ul>                                                                                                                                                 |
| 26. Did you need help by uploading the home video?                                                                                        | <ul style="list-style-type: none"> <li><input type="radio"/> Yes</li> <li><input type="radio"/> No</li> </ul>                                                                                                                                                                                                                                                                                        |
| 27. It feels safe to share the home video of my child.                                                                                    | <ul style="list-style-type: none"> <li><input type="radio"/> Absolutely</li> <li><input type="radio"/> Agree</li> </ul>                                                                                                                                                                                                                                                                              |

|                                                                              |                                                                                                       |
|------------------------------------------------------------------------------|-------------------------------------------------------------------------------------------------------|
|                                                                              | <ul style="list-style-type: none"><li>○ Neutral</li><li>○ Disagree</li><li>○ Absolutely not</li></ul> |
| 28. Do you have any remarks or comments on your participation in this study? |                                                                                                       |
