# Supplementary material for: Concurrent Validity Between Live and Home Video Observations Using the Alberta Infant Motor Scale
Source: PubMed Central journal article supplement — Pediatr Phys Ther. 2017 Mar 27;29(2):146–51. doi: 10.1097/PEP.0000000000000363 (PMC5374751; doi:10.1097/pep.0000000000000363), 2017-03-27
Supplement: ppyty-29-146-s002.pdf [file ppyty-29-146-s002.pdf]

## The 4 positions to film

## Checklist 1

## Camera position

### Supine position

- Without a toy.
- Present a little toy above your baby, to elicit reaching and/ or grabbing.

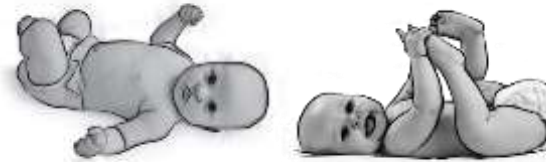

- From the side
- From the feet

### Prone position

- Lay your baby down in prone position with his/ her hands at shoulder level. Film a few seconds without making contact. After that make contact with your baby to see if he/ she is able to actively raise the head.
- Present a small toy right in front of your baby.

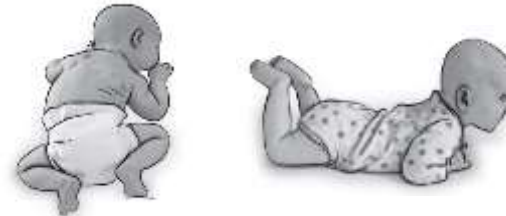

- From the side
- From the head

### Sitting

#### Pull to sit

- Make eye contact with your baby in supine position, so he/ she turns the head to the midline. Then hold the wrists of your baby and pull gently. When the head still lags behind, lay down your baby gently.
- Repeat this one more time.

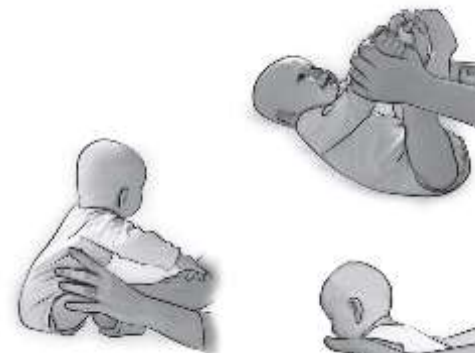

- From the side

#### Sitting with support

- See if your baby can sit without support for a brief moment. Your baby may use the arms as support forward.
- Keep your hands close by, sitting is not a stable position yet.

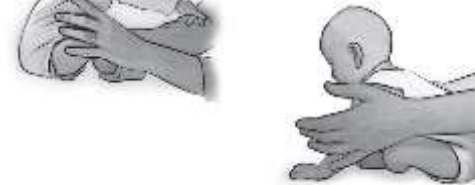

- From the side

### Standing

- Hold your baby between the pelvic and the shoulders. Let the feet touch the floor and see if your baby takes some weight on the feet or toes.

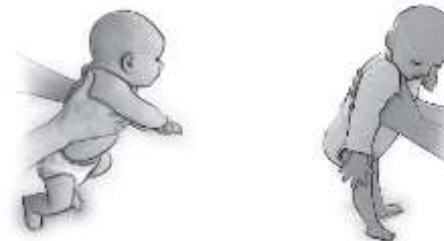

- At the front
- From the side

## **CHECKLIST 1**

### **The baby is not rolling over yet**

This checklist can be used during filming. Don't forget to watch the instruction video.

In this checklist you will find:

- The movements and positions we want you to capture on the home-video
- Tips to pay attention to, so your home video can be used to assess motor performance.

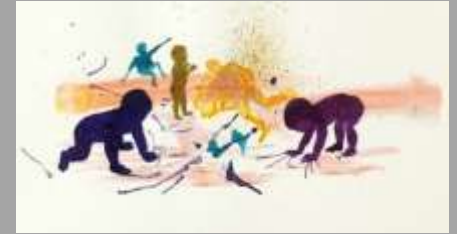

#### **Please pay attention to:**

##### **General**

- We will assess motor skills of your baby, so let him/her move freely and try not to help with your hands.
- A good way to start the video is to film spontaneous movements of your baby; please don't elicit movement with toys or sounds right away.
- During filming, make contact with your baby like you always do.
- The positions we ask you to film do not have to be filmed in the order displayed. Breaks can be taken if that's desirable.
- If you make the home video with your smartphone, the phone has to be in a horizontal position.
- During filming, your baby should only be wearing a body suit.

##### **Environment**

- Try to film with the light source behind you.
- Film your baby on the floor.
- Make sure the under layer is firm and prevents sliding.

##### **Duration and timing**

- Make sure you have 10-15 minutes on tape. The maximum length of the home video is 30 minutes
- When your baby is getting tired or discomforted, it is better to stop and start filming again another time.

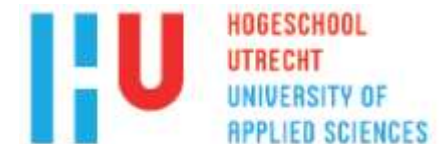

<sup>1</sup>The development of this checklist was part of a grant research project (2013-53P).
