# Supplementary material for: Concurrent Validity Between Live and Home Video Observations Using the Alberta Infant Motor Scale
Source: PubMed Central journal article supplement — Pediatr Phys Ther. 2017 Mar 27;29(2):146–51. doi: 10.1097/PEP.0000000000000363 (PMC5374751; doi:10.1097/pep.0000000000000363), 2017-03-27
Supplement: ppyty-29-146-s004.pdf [file ppyty-29-146-s004.pdf]

## The 4 positions to film

## Checklist 3

## Camera position

### Supine position

- Please, turn on the camera when you take off your baby's clothes in supine position.
- At this age, your baby can roll over very easily. Try to capture rolling over to both sides.

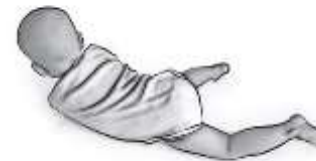

- From the feet and the side

### Prone position

- Film your baby moving forward, this can be crawling or creeping.
- Try to film the transfer from sit to crawling.

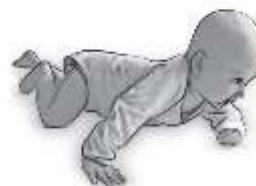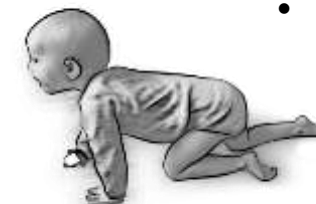

- From the side

### Sitting

- Film your baby while he/ she is transferring to sit. Let it play with some toys in this position.
- Present a toy to your baby at both the left and the right side and out of reach, so he/ she has to turn to reach for the toy.
- If your baby is able to transfer from sit into the crawling position, please film that.

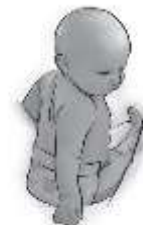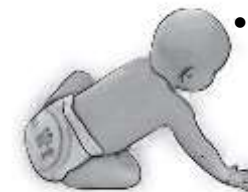

- From the side

### Standing

- Put some toys on the couch or the table. If your baby does not pull up to a standing position, help your baby on the feet.
- Encourage walking along the couch or table by replacing toys or making contact.
- Is your baby capable to transfer from a standing position to a sitting position? Try to capture this.
- If your baby is able to stand or walk without support, please film this.
- Playing in a squatted position without support is the final position to film.

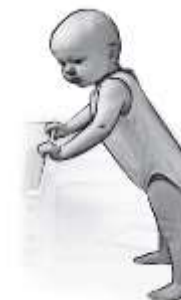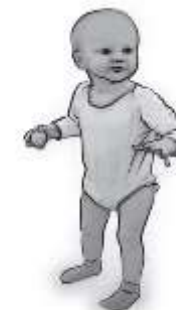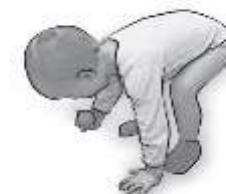

- From the side

## CHECKLIST 3

### *The baby is crawling and/ or walking*

This checklist can be used during filming. Don't forget to watch the instruction video.

In this checklist you will find:

- The movements and positions we want you to capture on the home video.
- Tips to pay attention to, so your home video can be used to assess motor performance.

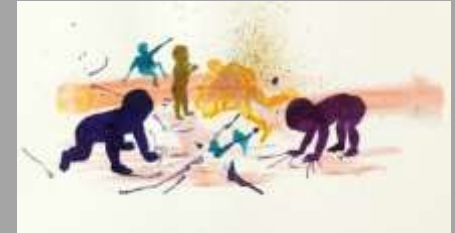

#### **Please pay attention to:**

##### **General**

- We will assess motor skills of your baby, so let him/her move freely and try not to help with your hands.
- A good way to start the video is to film spontaneous movements of your baby; please don't elicit movement with toys or sounds right away.
- During filming, make contact with your baby like you always do.
- The positions we ask you to film do not have to be filmed in the order displayed. Breaks can be taken if that's desirable.
- If you make the home video with your smartphone, the phone has to be in a horizontal position.
- During filming, your baby should only be wearing a body suit.

##### **Environment**

- Try to film with the light source behind you.
- Make sure there is enough room for your baby to move around.

##### **Duration and timing**

- Make sure you have 10-15 minutes on tape. The maximum length of the home video is 30 minutes.
- When your baby is getting tired or discomforted, it is better to stop and start filming again another time.

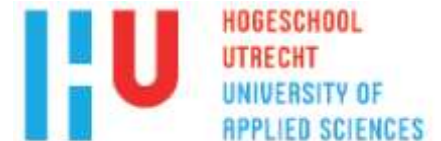

<sup>1</sup> The development of this checklist was part of a grant research project (2013-53P).
